# Supplementary material
Source: ML conference proceedings conference paper supplement (https://openreview.net/forum?id=7VEECFBzmm)
Supplement: supplementary_material [file README.pdf › DanceTog-supp/README.pdf]

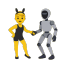

# DanceTogether: Generating Interactive Multi-Person Video without Identity Drifting

---

## ICLR 2026 Submission #1215 – Supplementary Material

**Important:** Please unzip all files before viewing to ensure full functionality.

This supplementary package for ICLR 2026 Submission #1215 includes additional materials to support the main paper. The contents are organized as follows:

**ClickOnThisIndex.html** : The entry point to the interactive supplementary webpage. It features dual-person interactive video examples generated by *DanceTog*, human and humanoid robot interaction video examples, and a link to the main supplementary document.

**static/** : A folder containing all supporting assets required by the supplementary webpage, including all case videos (compressed).

**DanceTogether-code.zip** : Contains the core architecture code of DanceTog, including data processing, training, inference, and evaluation code. Due to the large size of the dataset and pre-trained weights, we have not included these two components. The complete code, pre-trained weights, and dataset will be made publicly available upon paper acceptance.
